# Supplementary material for: Societies Drifting Apart? Behavioural, Genetic and Chemical Differentiation between Supercolonies in the Yellow Crazy Ant Anoplolepis gracilipes
Source: PLOS journal article supplement (doi:10.1371/journal.pone.0013581), 2010-10-22
Supplement: S6 (10.1371/journal.pone.0013581.s006) [file journal.pone.0013581.s006]

# Societies Drifting Apart? Behavioural, Genetic and Chemical Differentiation Between Supercolonies in the Yellow Crazy Ant *Anoplolepis gracilipes*

Jochen Drescher, Nico Blüthgen, Thomas Schmitt, Jana Bühler, Heike Feldhaar

**Table S1 Aggression of workers towards allocolonial workers, males and queens.** The number of crosses represent the frequency of aggression of workers towards allocolonial queens (red crosses), males (blue crosses) and workers (black crosses) from four different *Anoplolepis gracilipes* supercolonies (supercolonies K1, S6, S7 and S10; ++: aggression was observed in more than 50% of all replicates; +++: aggression observed in more than 75% of all replicates).

|     | K1  | S6         | S7      | S10      |
|-----|-----|------------|---------|----------|
| K1  | —   | +++ / ++++ | ++ / ++ | ++ / ++  |
| S6  | +++ | —          | ++ / ++ | +++ / ++ |
| S7  | ++  | ++         | —       | ++ / ++  |
| S10 | ++  | +++        | +++     | —        |
